# Supplementary material for: 혈중 납과 망간의 농도와 정신증상과의 관계
Source: Oxford University Press journal article supplement (doi:10.1242/dev.184895), 2008-01-01
Supplement: dev184895supp.pdf [file dev184895supp.pdf]

## SUPPLEMENTARY INFORMATION

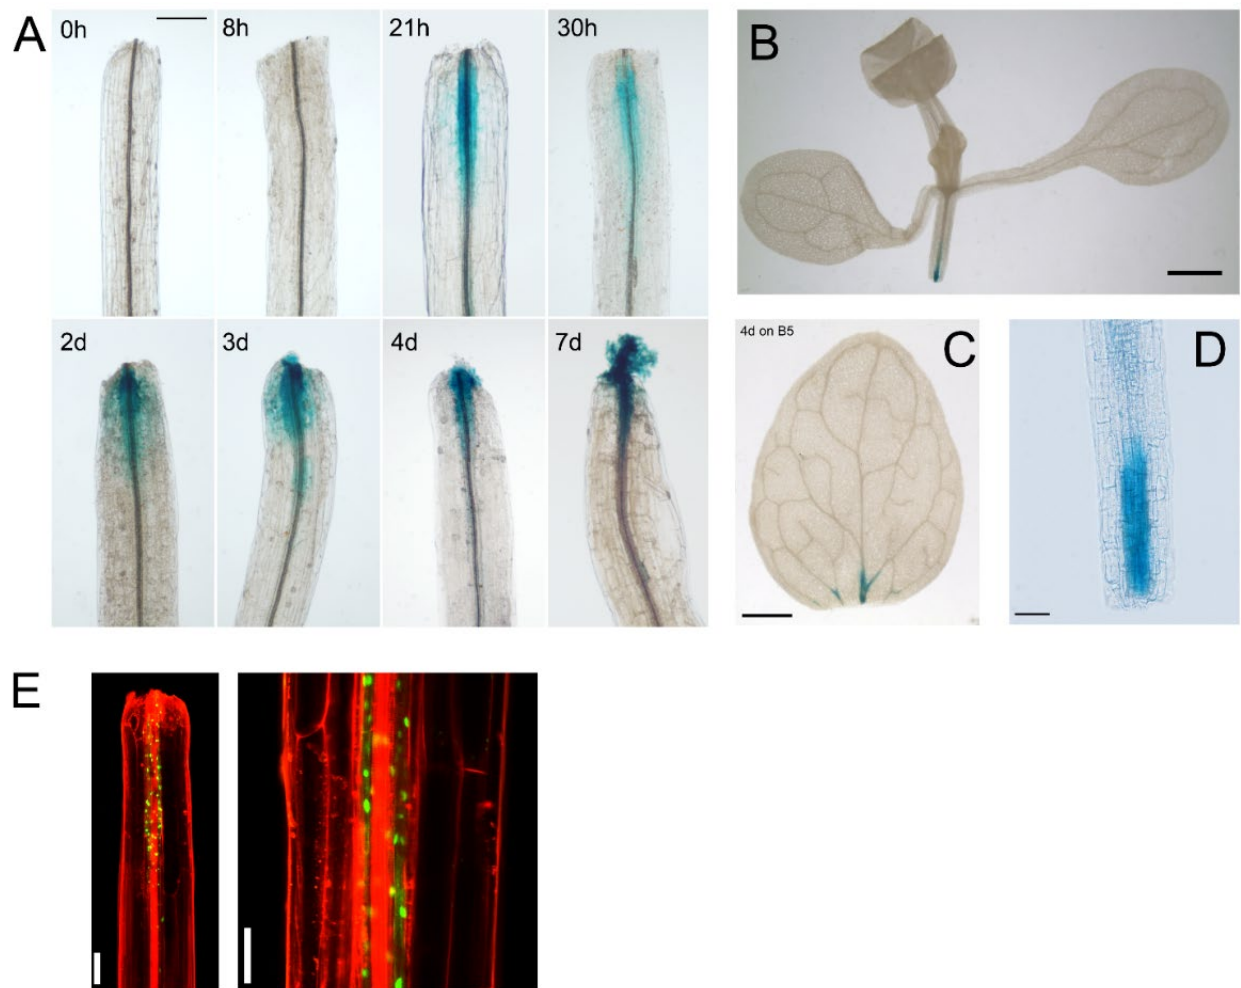

**Fig. S1. *HTR15* expression was induced at wound sites in various *Arabidopsis* tissues.** (A) GUS staining shows *HTR15* expression at wound sites of hypocotyls. *HTR15* expression is induced within a few hours after wounding. *HTR15* promoter activity was also observed at wound sites of stems (B), leaves (C), and roots (D). (E) Confocal imaging shows *HTR15* expression in pericycle-like cells at wound site of hypocotyl. Scale bars: 200  $\mu\text{m}$  (A); 1 mm (B,C); 50  $\mu\text{m}$  (D,E).

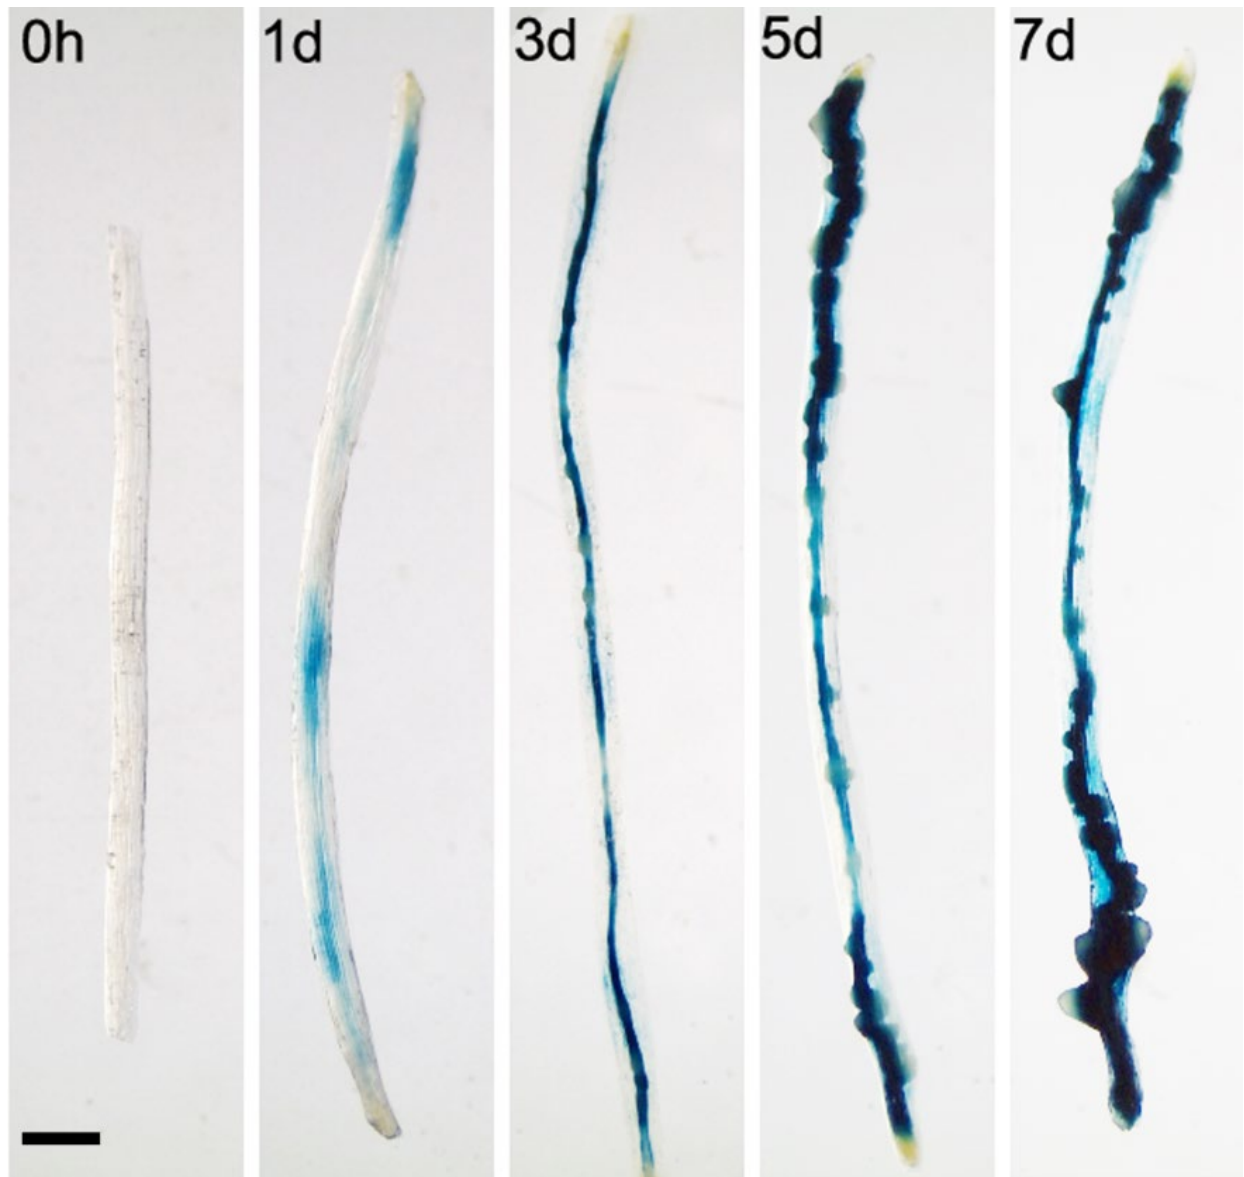

**Fig. S2. Expression pattern of *HTR15* during CIM-induced callus formation.** GUS staining shows *HTR15* expression during CIM incubation. Hypocotyl explants of 7-day-old *pHTR15::GUS* were incubated on CIM and GUS staining assay was performed at the indicated time points. Scale bar: 200  $\mu\text{m}$ .

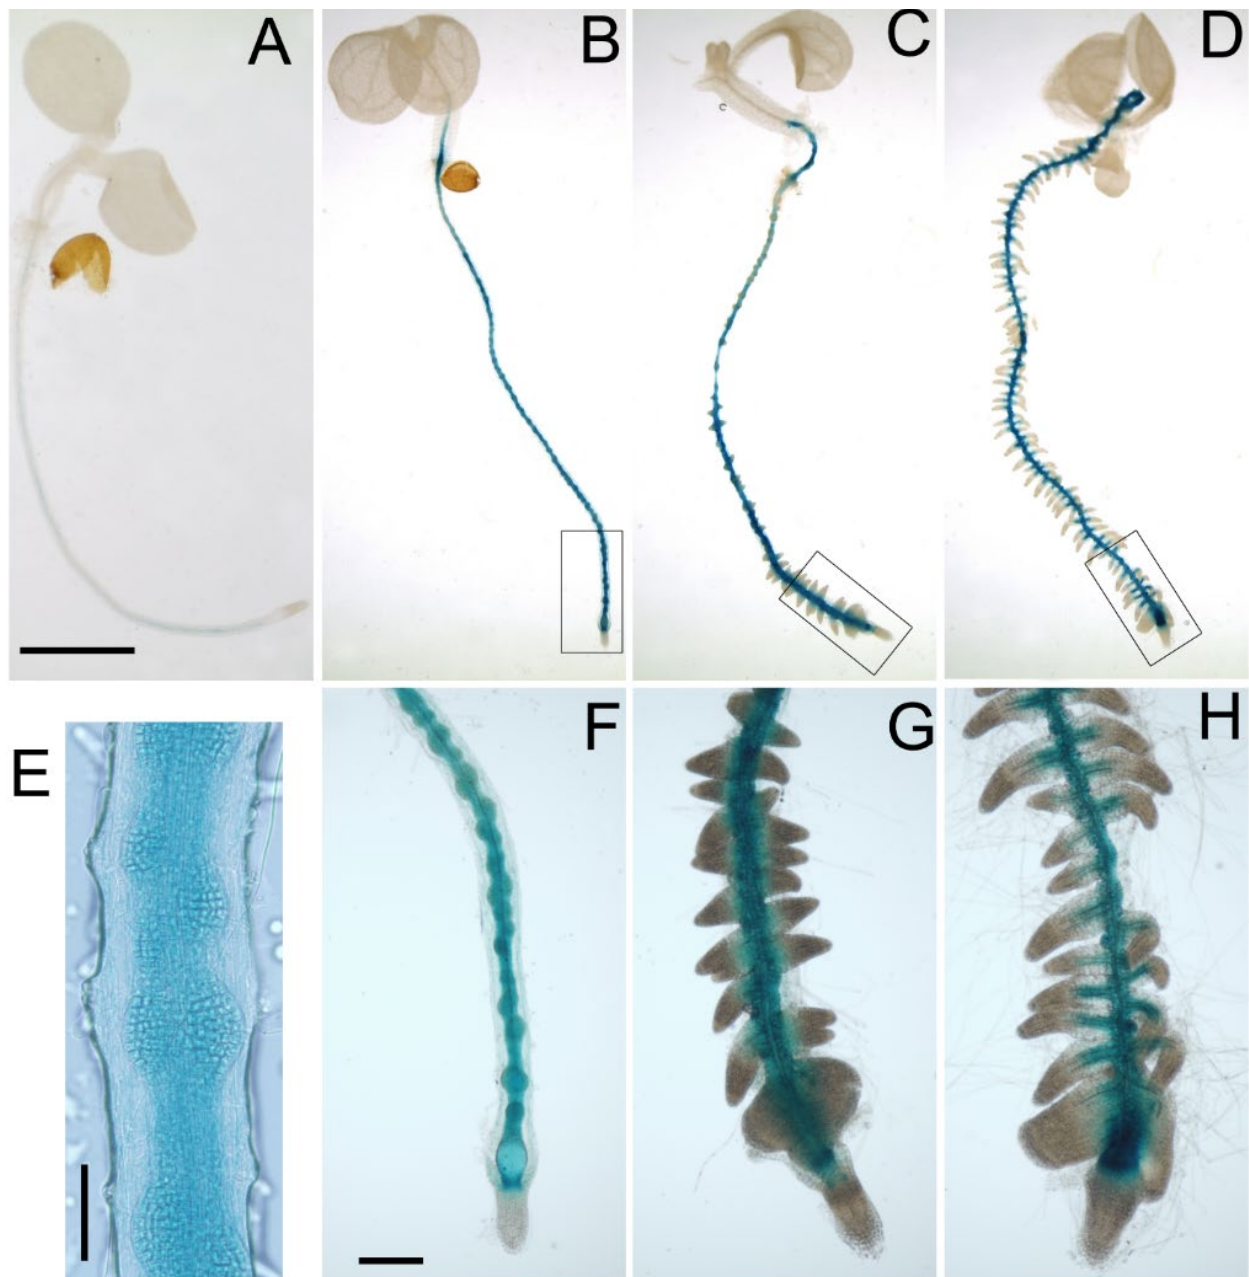

**Fig. S3. *HTR15* expression is up-regulated by auxin.** (A) GUS staining shows *HTR15* promoter activity before NAA treatment. (B,F) GUS staining shows *HTR15* promoter activity after *pHTR15::GUS* was treated with 10 μM NAA for 2 days. (C,G) GUS staining shows *HTR15* promoter activity after *pHTR15::GUS* was treated with 10 μM NAA for 3 days. (D,H) GUS staining shows *HTR15* promoter activity after *pHTR15::GUS* was treated with 10 μM NAA for 5 days. (E) GUS staining shows *HTR15* promoter activity at lateral root primordium. Scale bars: 1 mm (A-D); 100 μm (F-H); 50 μm (E).

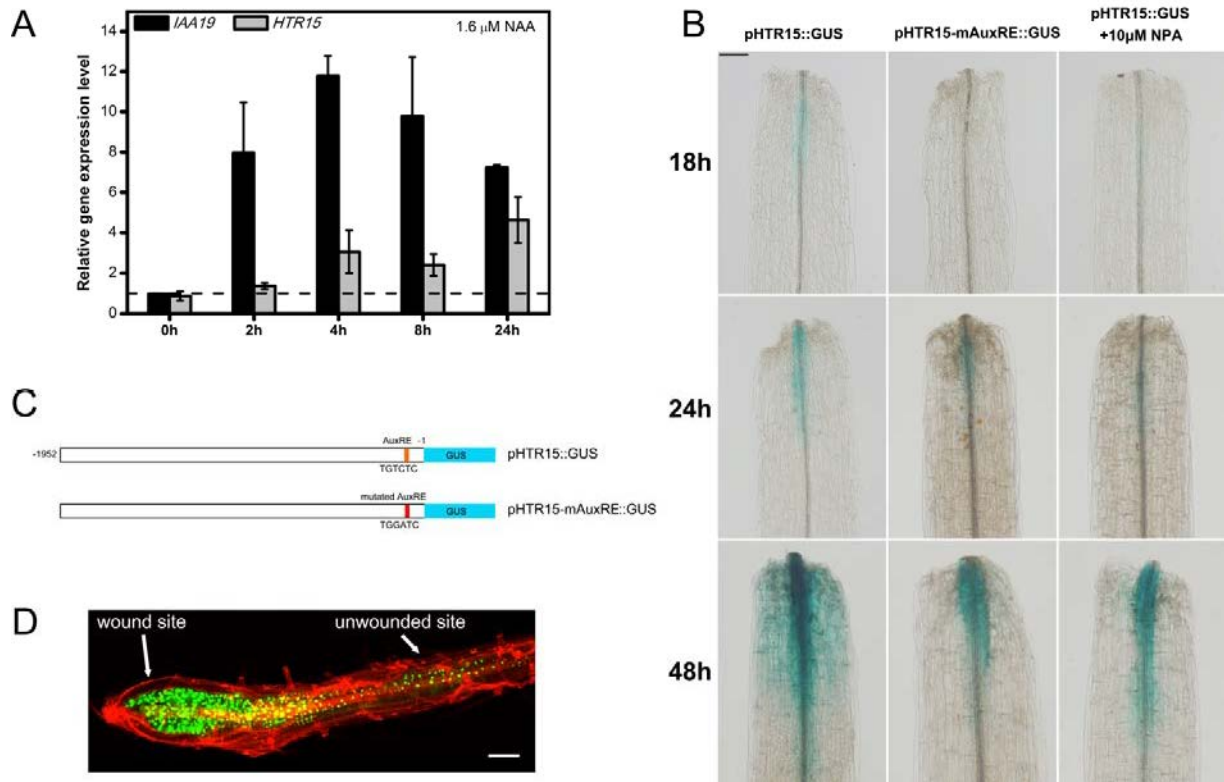

**Fig. S4. Auxin is involved in the regulation of *HTR15* expression.** (A) qRT-PCR analysis of *HTR15* induction by auxin. 7-day-old seedlings were transferred to ½ MS media supplemented with 1.6 μM NAA for the indicated period. *IAA19* was used as a positive control. Relative expression levels of *IAA19* and *HTR15* are normalized against those of the *PP2AA3* gene and shown relative to their expression levels at 0 h. Expression data are mean±s.d. ( $n=3$ , biological replicates). (B) GUS staining shows *HTR15* promoter activity at wound sites of *pHTR15::GUS* (left panel), mutated *HTR15* promoter activity at wound site of *pHTR15-mAuxRE::GUS* (middle panel), *HTR15* promoter activity at wound site of *pHTR15::GUS* hypocotyls after 10 μM NPA treatment (right panel). Scale bar: 100 μm. (C) Schematic diagram shows *HTR15* promoter-GUS reporter. (D) Confocal imaging shows *pHTR15::3GFP* expression at wound site and unwound site of root explant incubated on CIM. Scale bar: 100 μm.

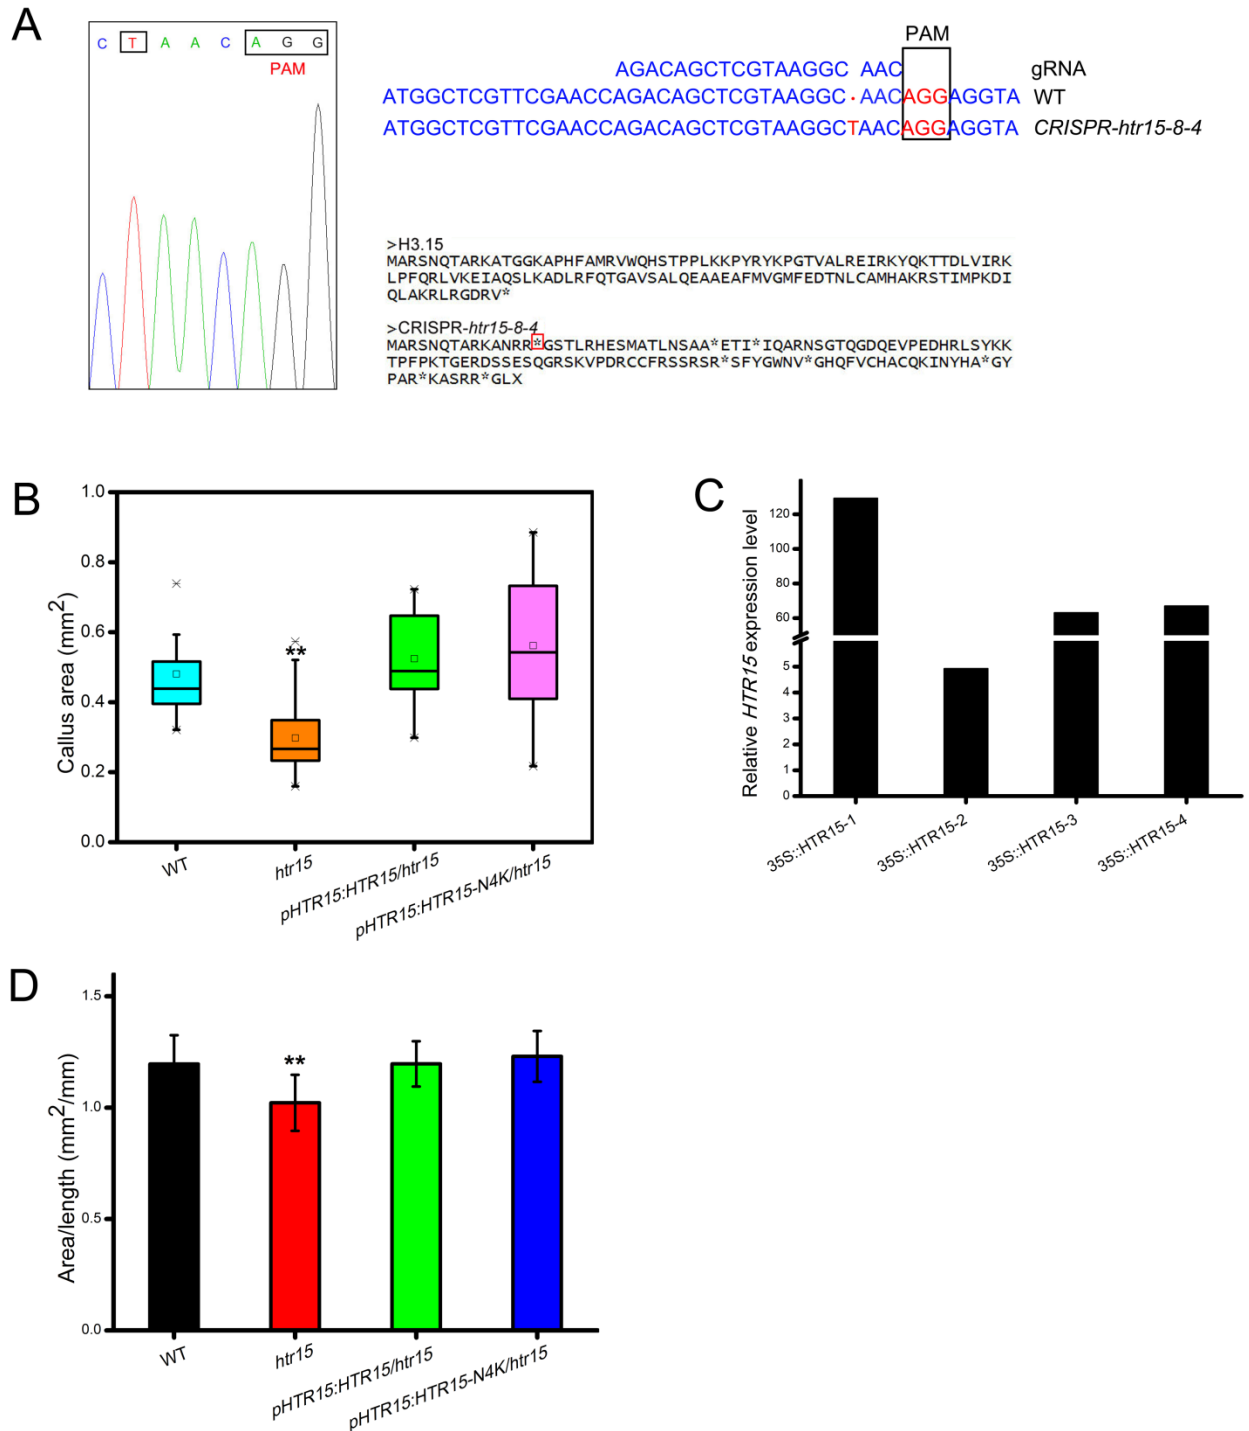

**Fig. S5. H3.15 promotes CIM-induced callus formation.** (A) Mutation of *HTR15* by CRISPR/Cas9 technology. Sequencing chromatogram indicated a thymine (T) insertion in the front of the *HTR15* coding sequence, which introduces a premature stop codon. (B) Quantitative analysis of callus formation at

wound sites of wild-type, *htr15*, *pHTR15:HTR15/htr15*, and *pHTR15:HTR15-N4K/htr15* hypocotyls. After dissection, explants were cultured on phytohormone-free MS medium for 14 days. Box plots represent the distribution of projected callus area ( $n \geq 11$ ). The statistical significance was determined by Student's *t*-test (\*\* $P < 0.01$ ). (C) RT-qPCR analysis of *HTR15* overexpression lines. Relative expression levels of *HTR15* are normalized against those of the *PP2AA3* gene and shown relative to their expression levels in wild type. (D) Quantitative analysis of callus formation of WT, *htr15*, *pHTR15:HTR15/htr15*, and *pHTR15:HTR15-N4K/htr15* hypocotyl explants incubated on CIM for 28 days. The length and area of hypocotyl explants were measured with image-Pro plus 6.0 software. Data are mean  $\pm$  s.d. ( $n \geq 12$ , \*\* $P < 0.01$ ; Student's *t*-test).

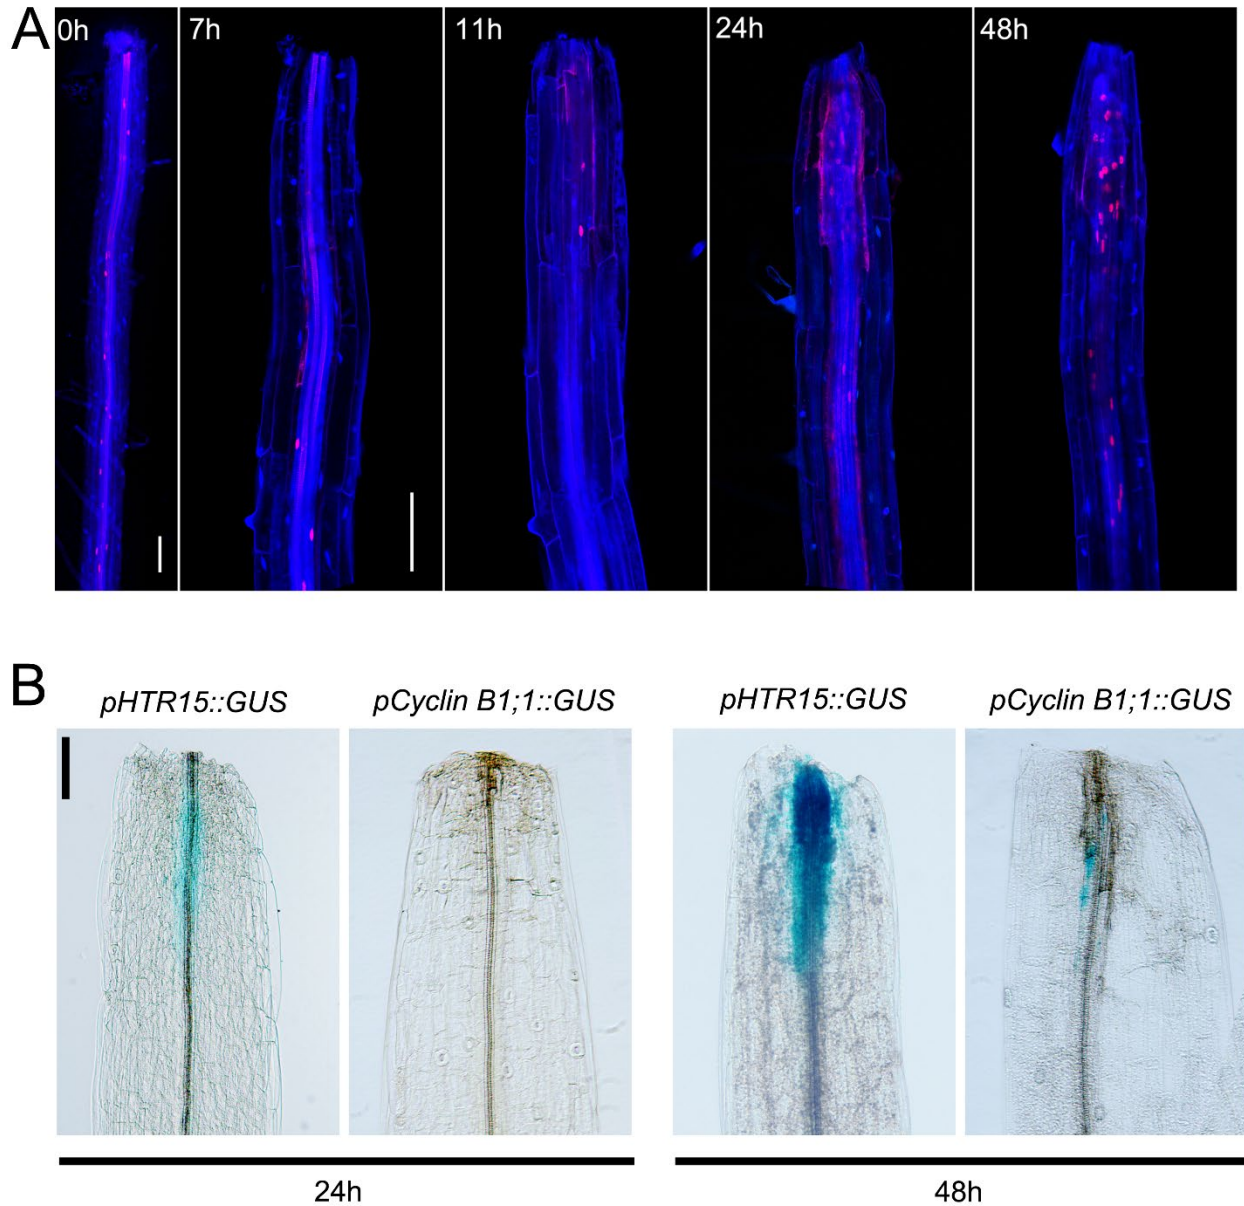

**Fig. S6. H3.15 expression and incorporation is independent of cell cycle dynamics.** (A) EdU staining shows DNA replication after root wounding. Nuclei were labeled with Hoechst 33342 and visualized as blue dot (425-475 nm), while nuclei undergoing DNA synthesis were labelled by EdU and visualized as red dot (663-738 nm). Scale bars: 100  $\mu$ m. (B) GUS staining shows induction of *HTR15* and *Cyclin B1;1* at hypocotyl wound sites. Scale bar: 100  $\mu$ m.

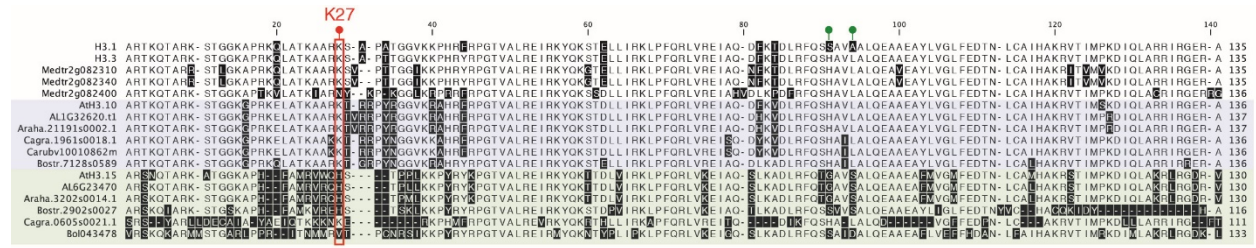

**Fig. S7. Homologs of H3.10 and H3.15.** Sequence alignment of homologs of variants H3.10 and H3.15 in close relatives of *Arabidopsis thaliana* (*At*), *Arabis lyrata* (*AL*), *Arabis halleri* (*Araha*) and *Boechera stricta* (*Bostr*) as well as in other dicots *Brassica oleracea* (*Bol*), *Capsella rubella* (*Carub*), *Capsella grandiflora* (*Cagra*), and *Medicago truncatula* (*Medtr*). The two groups of homologs are highlighted in purple (H3.10) and green (H3.15).



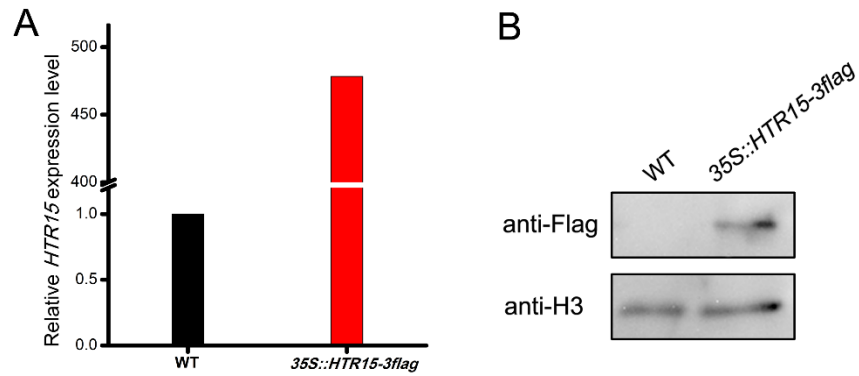

**Fig. S8. Verification of 35S::*HTR15-3flag*.** (A) RT-qPCR analysis of *HTR15* expression. (B) Western blot assay of H3.15-flag fusion protein. WT and 35S::*HTR15-3flag* hypocotyl explants were incubated on CIM for 30 days. H3 served as a loading control.

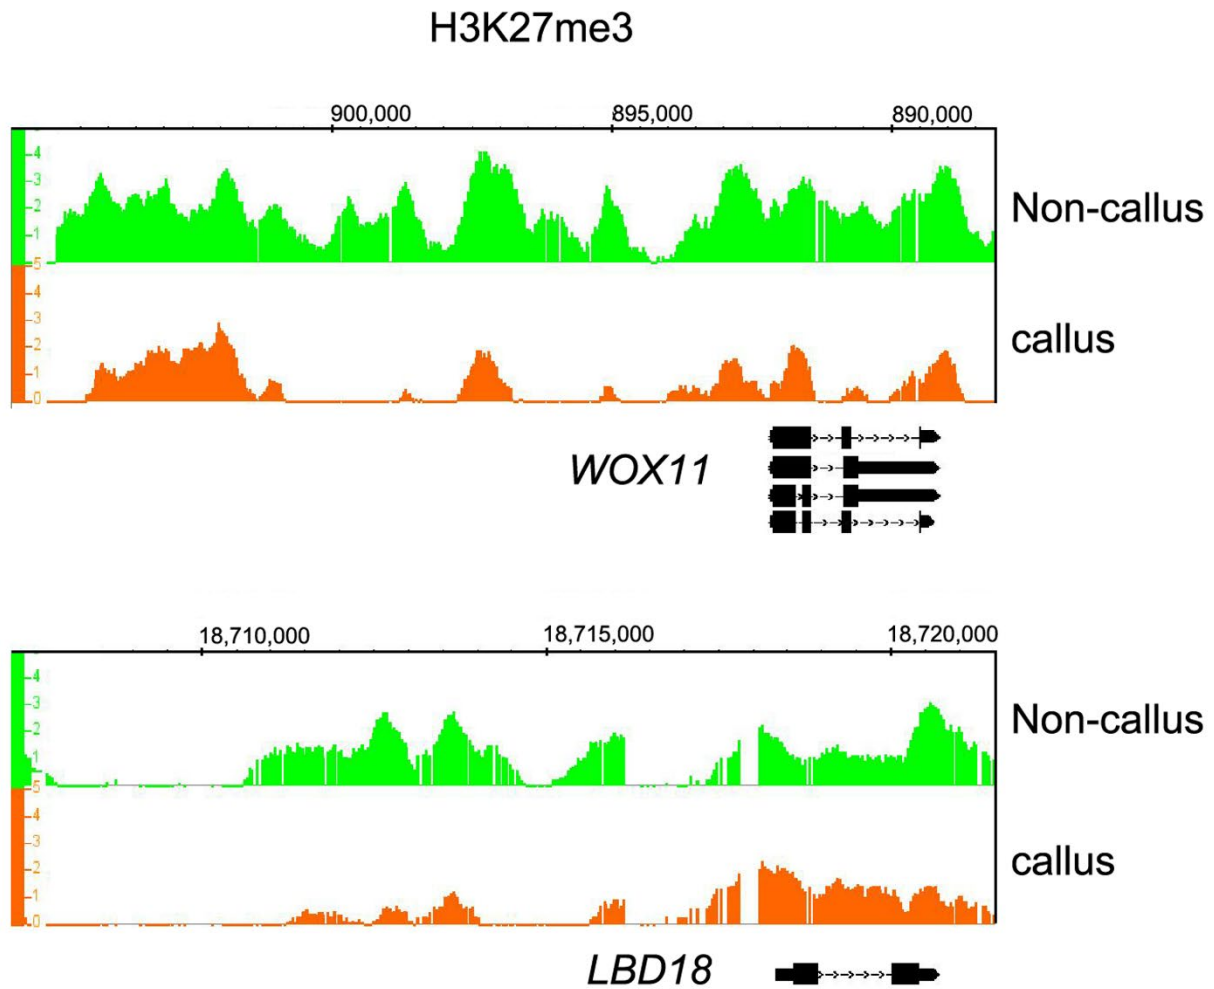

**Fig. S9. H3K27me3 levels decreased at *WOX11* and *LBD18* loci during CIM-induced callus formation.** Data were retrieved from previously established databases (He et al., 2012).

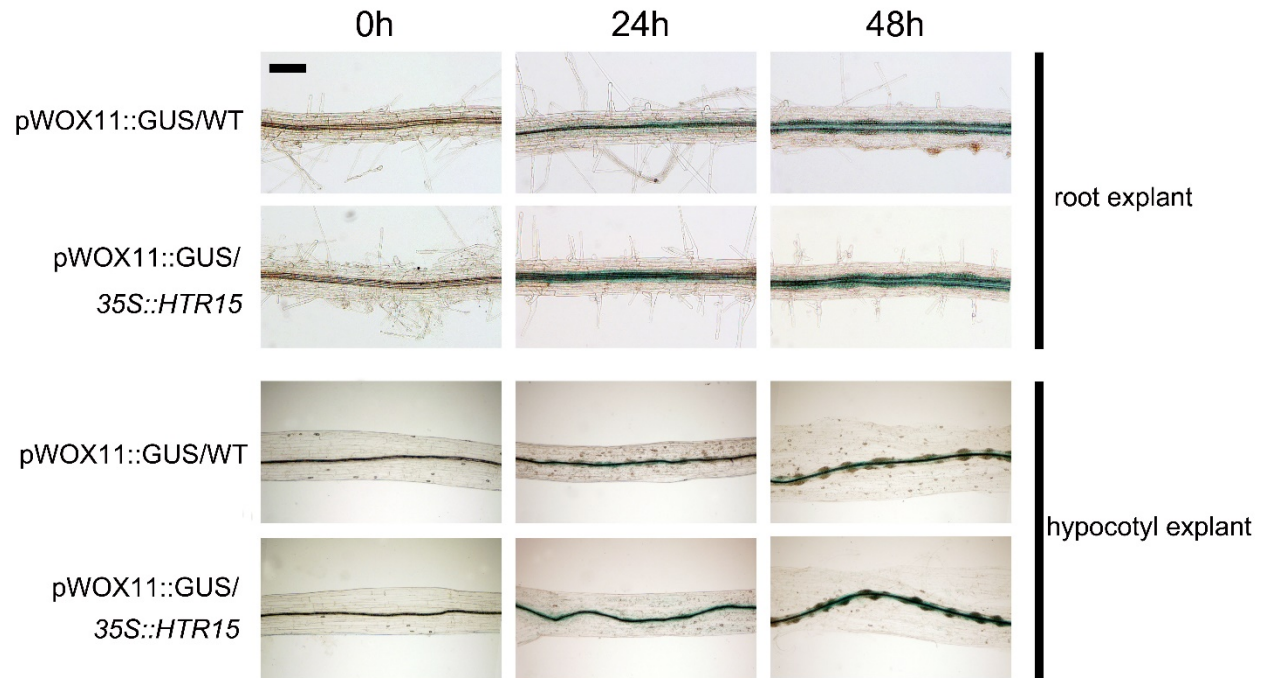

**Fig. S10. H3.15 promotes *WOX11* expression during CIM-induced callus formation.** GUS staining shows promoter activity of *WOX11* in wild-type and *35S::HTR15* explants during CIM incubation, respectively. Scale bar: 100  $\mu$ m.

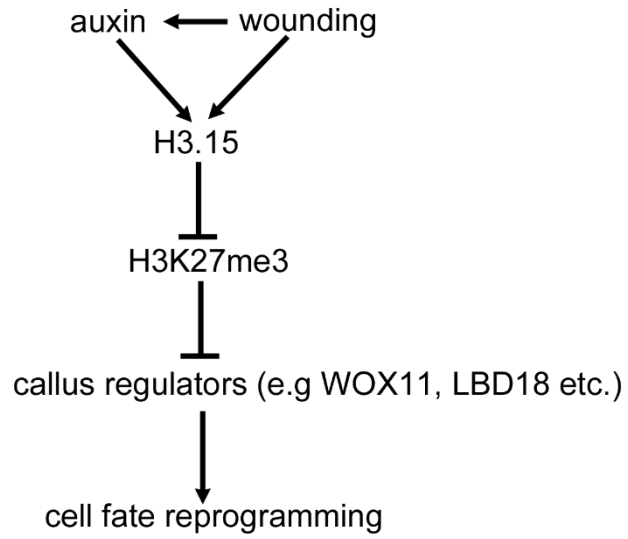

**Fig. S11. Proposed model of the role of the H3.15 pathway in plant regeneration.**

**Table S1. Primers used in this study**

## A. plasmid construction

|                                     |                  |                                           |
|-------------------------------------|------------------|-------------------------------------------|
| <i>HTR15</i><br>CDS                 | HTR15cd-F        | ccctcgagTGCTCACTATGGCTCGTT                |
|                                     | HTR15cd-R        | cgggatccTCAAACCCTATCGCCTCG                |
| <i>HTR15</i><br>genomic<br>sequence | HTR15pm-F        | atgggcccGAGAAATGCTATCCCGTTA               |
|                                     | HTR15cdnos-<br>R | ccctcgagAACCTATCGCCTCGAAG                 |
| <i>HTR15</i><br>promoter            | HTR15pm-F        | atgggcccGAGAAATGCTATCCCGTTA               |
|                                     | HTR15pm-R        | ccctcgagAGTGAGCAAATCAACTTTG               |
|                                     | mAuxRE-F         | TAAATGGATCCACCCACAACTCTCAATACATATC        |
|                                     | mAuxRE-R         | GGGTGGATCCATTTATTTATTTGTGGAGAATCTAA       |
| H3.15<br>mutation                   | N4K-F            | ccctcgagATGGCTCGTTCGAAGCAGACAGCT          |
|                                     | H27K-F           | TGGCAAAGTCAACTCCGCCGCTTAAGAAACC           |
|                                     | H27K-R           | AGTTGACTTTTGCCATACTCTCATGGCGAAGT          |
|                                     | KA-step1-F       | TGGCGAAAGTCAGCTCCGCCGCTTAAGAAACC          |
|                                     | KA-step1-R       | GCTGACTTTCGCCATACTCTCATGGCGAAGTGTG        |
|                                     | KA-step2-F       | GCTCCGGCGACCGGAGGAGTTAAGAAACCATATAGATACAA |
|                                     | KA-step2-R       | GGTCGCCGGAGCTGACTTTCGCCATACTCTC           |
|                                     | KA-step3-F       | CCACAAAGGCGGCGCGAAAGTCAGCTCCG             |
|                                     | KA-step3-R       | GCCGCCTTTGTGGCGAAGTGTGGAGCCTTA            |

## B. qRT-PCR

|            |                           |
|------------|---------------------------|
| PP2AA3-Fwd | GACCAAGTGAACCAGGTTATTGG   |
| PP2AA3-Rev | TACTCTCCAGTGCCTGTCTTCA    |
| IAA19-Fwd  | GCCTTTGCTCTTGATAAGCTCTTC  |
| IAA19-Rev  | CTCTAGAAACATCCCCCAAGGTAC  |
| HTR1-Fwd   | CCGTTCCAGCGTTTGGTTCGT     |
| HTR1-Rev   | CGAGGTATGCTTCAGCCGCT      |
| HTR2-Fwd   | GCCACACAGATTCAGACCCGGA    |
| HTR2-Rev   | CGACGGCACTGCTCTGGAAA      |
| HTR3-Fwd   | GCCACACAGATTCGGTCCAGGA    |
| HTR3-Rev   | GCTGCTTCTTGAAGAGCTGCGA    |
| HTR4-Fwd   | CGGGTTTTGTCCCATTCCAGTT    |
| HTR4-Rev   | CGGATTTACGGAGAGCAACAGT    |
| HTR5-Fwd   | CTTGCTACAAAGGCTGCACGT     |
| HTR5-Rev   | GTCAGTCTTGAAATCCTGGGCA    |
| HTR6-Fwd   | CCGTCGCTCTTCGTGAGATTCGT   |
| HTR6-Rev   | GGCTTTGGAATCTCAGATCCGT    |
| HTR8-Fwd   | CAGGAACCGTCGCTCTTCGTGA    |
| HTR8-Rev   | CAGATCCGTCTTGAAGTCCTGAGCT |

|           |                         |
|-----------|-------------------------|
| HTR9-Fwd  | CCGCGAGGAAATCCACAGGA    |
| HTR9-Rev  | CCTGGACGGAATCTATGCGGCT  |
| HTR10-Fwd | GTCGCTCTTCGTGAGATCCGCAA |
| HTR10-Rev | GCACCGCATGGCTTTGGAACCT  |
| HTR12-Fwd | CTTCTCAGGCGGCAGGTCCAA   |
| HTR12-Rev | CTTCTTCTGTGAGCCTCGTGGCA |
| HTR13-Fwd | GCCACACAGATTCCGTCCAGGA  |
| HTR13-Rev | CGGCACTGCTCTGGAACCTCA   |
| HTR14-Fwd | AGCTCCGAGGACTCTGCTCG    |
| HTR14-Rev | GGGACGGTAACGGTGAGGTTT   |
| HTR15-Fwd | GAACCAGACAGCTCGTAAGGCAA |
| HTR15-Rev | GTGCCACTGTTCTGGCTTGT    |
| WOX11-Fwd | CTTCTTATGGTGGTGGATGT    |
| WOX11-Rev | AGCCCCTTGTGGTATTGA      |
| LBD16-Fwd | CCTCCAACAACAGGTGGCTT    |
| LBD16-Rev | TGGTACTTTCCGAGCTGTGTC   |
| LBD18-Fwd | TCAGCAACAGGTGGTGAATC    |
| LBD18-Rev | TCGGTTATGGCAAGAGGG      |
| LBD29-Fwd | CCAACAACAGGTTGTGAATT    |
| LBD29-Rev | CCTTAGTAGTGTCTCCATAGTA  |

|            |                          |
|------------|--------------------------|
| ERF115-Fwd | TTCCCTTTCTTCTCTGCCCG     |
| ERF115-Rev | CAATAGCCCTTGATCTTGAGTTGG |

## C. ChIP-qPCR

|             |                        |
|-------------|------------------------|
| TUB2-Fwd    | ATCCGTGAAGAGTACCCAGAT  |
| TUB2-Rev    | AAGAACCATGCACTCATCAGC  |
| WOX11-1-Fwd | GCAAACCTAACGCGTCTCACA  |
| WOX11-1-Rev | GAGACAGATATGCTTTAAATTG |
| WOX11-2-Fwd | GGGAGATGCAAATGTCTTCT   |
| WOX11-2-Rev | CCAAATCACTCCCCTATGA    |
| WOX11-3-Fwd | TGGTGCATTCTCAGGTGTT    |
| WOX11-3-Rev | CACGAGGAATTCGATCAGCA   |
| WOX11-4-Fwd | CCCTTACTTCACATAATGGGA  |
| WOX11-4-Rev | CATGTCTGTCTTGGAACCTG   |
| LBD18-1-Fwd | CGTGAATGCTCATTTTAACTTA |
| LBD18-1-Rev | GAAGAAAGACCTTTTTGATAAG |
| LBD18-2-Fwd | GCCATGTGGTGCTTGTAAGT   |
| LBD18-2-Rev | CTTCGATGAACCGGTATGTG   |
| LBD18-3-Fwd | GGTGAATAACAGGTAATTGCT  |



|             |                       |
|-------------|-----------------------|
| LBD18-3-Rev | CGCTTAACGTGATAGCTTAAT |
| LBD18-4-Fwd | CGTCACCAATACGGTGTATC  |
| LBD18-4-Rev | TAGACATAGTTCGAGACGGC  |

## References

**He, C., Chen, X., Huang, H. and Xu, L. (2012).** Reprogramming of H3K27me3 is critical for acquisition of pluripotency from cultured *Arabidopsis* tissues. *PLoS Genet.* **8**, e1002911.
